# Supplementary material
Source: Springer Nature journal article supplement (https://www.springermedizin.de/resource/supplementary/13643_2013_178_MOESM1_ESM.pdf/9681450)
Supplement: MOESM1 [file 9681450]

### Search strategies replicated from included articles and obtained results

| First author | Original search description                                                                                                                                                                               | Search strategy                                                                                                                                                                                           | Changes                                           | Original search date | starting year | Hits GS | Hits PubMed | Included items | Includes in GS (1000) | Includes in PubMed |
|--------------|-----------------------------------------------------------------------------------------------------------------------------------------------------------------------------------------------------------|-----------------------------------------------------------------------------------------------------------------------------------------------------------------------------------------------------------|---------------------------------------------------|----------------------|---------------|---------|-------------|----------------|-----------------------|--------------------|
| Belsey       | (constipation) AND (randomised OR randomized) AND (PEG OR polyethylene OR macrogol OR movicol OR idrolax OR miralax OR transipeg OR forlax OR colyte OR golytely OR isocolan OR nulytely) NOT colonoscopy | (constipation) AND (randomised OR randomized) AND (PEG OR polyethylene OR macrogol OR movicol OR idrolax OR miralax OR transipeg OR forlax OR colyte OR golytely OR isocolan OR nulytely) NOT colonoscopy | Exact                                             | 1-10-2009            | 1970          | 1630    | 57          | 20             | 7                     | 14                 |
| Bomback      | "membranous" and "rituximab."                                                                                                                                                                             | membranous AND rituximab                                                                                                                                                                                  | Exact                                             | 1-8-2008             |               | 18800   | 49          | 21             | 17                    | 18                 |
| Cassie       | "preoperative weight loss" AND "bariatric" OR "obesity"                                                                                                                                                   | "preoperative weight loss" AND (bariatric OR obesity)                                                                                                                                                     | Added necessary parentheses                       | 1-1-2011             |               | 931     | 47          | 26             | 21                    | 16                 |
| Deeba        | obturator hernia AND laparoscopic                                                                                                                                                                         | obturator hernia AND laparoscopic                                                                                                                                                                         | Exact                                             | 1-12-2009            | 1991          | 2900    | 51          | 17             | 17                    | 17                 |
| Donnenwerth  | "microfracture" AND "ankle" OR "talus"                                                                                                                                                                    | microfracture AND (ankle OR talus)                                                                                                                                                                        | Added necessary parentheses                       | 1-1-2012             |               | 5600    | 31          | 7              | 7                     | 6                  |
| Espinosa     | "Hispanic, Hispano, Hispana, Latino, or Latina," and "fatalism, fatalismo, or fatalistic beliefs" and "cancer screening or cancer."                                                                       | (Hispanic OR Hispano OR Hispana OR Latino OR Latina) AND (fatalism OR fatalismo OR fatalistic beliefs) AND (cancer screening OR cancer)                                                                   | Added necessary parentheses and Boolean operators | 25-2-2010            |               | 4000    | 36          | 11             | 9                     | 7                  |
| Gougoulias   | 'calcaneal' and 'fractures',                                                                                                                                                                              | calcaneal AND fractures                                                                                                                                                                                   | Exact                                             | 5-12-2008            |               | 24700   | 2027        | 6              | 6                     | 6                  |

| <b>First author</b> | <b>Original search description</b>                                                                                                                                                                       | <b>Search strategy</b>                                                                                                                                                   | <b>Changes</b>                                                            | <b>Original search date</b> | <b>starting year</b> | <b>Hits GS</b> | <b>Hits PubMed</b> | <b>Included items</b> | <b>Includes in GS (1000)</b> | <b>Includes in PubMed</b> |
|---------------------|----------------------------------------------------------------------------------------------------------------------------------------------------------------------------------------------------------|--------------------------------------------------------------------------------------------------------------------------------------------------------------------------|---------------------------------------------------------------------------|-----------------------------|----------------------|----------------|--------------------|-----------------------|------------------------------|---------------------------|
| Gupta               | fesoterodine, overactive bladder, and muscarinic antagonists                                                                                                                                             | Fesoterodine AND overactive bladder AND muscarinic antagonists                                                                                                           | Added necessary Booleans                                                  | 1-12-2009                   |                      | 528            | 21                 | 16                    | 9                            | 8                         |
| Hardefeldt          | “thyroid disease” or “hyperthyroid” or “hypothyroid”, “thyroiditis” or “graves” AND “breast disease”, or “breast carcinoma”, or “breast cancer” or “breast neoplasm”                                     | (“thyroid disease” OR “hyperthyroid” OR “hypothyroid” OR “thyroiditis” OR “graves”) AND (“breast disease” OR “breast carcinoma” OR “breast cancer” OR “breast neoplasm”) | Added necessary parentheses                                               | 1-12-2011                   |                      | 19200          | 188                | 26                    | 22                           | 18                        |
| Hasani              | “obesity” and (“herbal medicine” or “plant”, “plant medicinal” or “medicine traditional”)                                                                                                                | obesity AND (“herbal medicine” OR plant OR “plant medicinal” OR “medicine traditional”)                                                                                  | Added necessary Booleans                                                  | 1-1-2009                    |                      | 109000         | 699                | 78                    | 20                           | 51                        |
| Jahangiri           | PubMed: (IBS[All Fields] OR (“irritable bowel syndrome”[MeSH Terms] OR “irritable bowel syndrome”[All Fields])) AND “Iran”[All Fields].<br>Google Scholar: “Irritable bowel syndrome”, “IBS”, and “Iran” | (“Irritable bowel syndrome” OR IBS) AND Iran                                                                                                                             | Exact: PubMed search was described with details of Automatic Term Mapping | 10-3-2012                   |                      | 5070           | 57                 | 18                    | 13                           | 8                         |

| First author   | Original search description                                                                                                                                                                                                                                         | Search strategy                                                                                                                                                                                                                                                   | Changes                                                           | Original search date | starting year | Hits GS | Hits PubMed | Included items | Includes in GS (1000) | Includes in PubMed |
|----------------|---------------------------------------------------------------------------------------------------------------------------------------------------------------------------------------------------------------------------------------------------------------------|-------------------------------------------------------------------------------------------------------------------------------------------------------------------------------------------------------------------------------------------------------------------|-------------------------------------------------------------------|----------------------|---------------|---------|-------------|----------------|-----------------------|--------------------|
| Javan          | ("excisional biopsy" OR "prior Biopsy" OR "previous biopsy" OR "surgical biopsy" OR "open biopsy" OR "excision biopsy" OR "biopsy method" OR "biopsy technique" OR "detection failure" OR nonvisualization OR "non-visualization") AND "breast cancer" AND sentinel | ("excisional biopsy" OR "prior Biopsy" OR "previous biopsy" OR "surgical biopsy" OR "open biopsy" OR "excision biopsy" OR "biopsy method" OR "biopsy technique" OR "detection failure" OR nonvisualization OR non-visualization) AND "breast cancer" AND sentinel | Exact                                                             | 1-3-2011             |               | 6150    | 137         | 68             | 61                    | 29                 |
| Navarese       | "statins AND/OR diabetes."                                                                                                                                                                                                                                          | statins AND diabetes                                                                                                                                                                                                                                              | Changed necessary boolean                                         | 1-10-2012            | 1994          | 84800   | 3751        | 17             | 4                     | 5                  |
| Novak          | (i) adults; AND (ii) home programme OR home programme OR home exercise program; AND (iii) systematic review OR meta-analysis OR randomized controlled trial OR randomized controlled trial OR clinical trial.                                                       | adults AND ("home program" OR "home programme" OR "home exercise program") AND ("systematic review" OR "meta analysis" OR "randomized controlled trial" OR "clinical trial")                                                                                      | Small adaptation, quotes were necessary because of number of hits | 1-3-2011             |               | 4950    | 151         | 30             | 10                    | 19                 |
| Sadeghi        | "(penile or penis) and PET,"                                                                                                                                                                                                                                        | (penile OR penis) AND PET                                                                                                                                                                                                                                         | Exact                                                             | 1-5-2011             |               | 2680    | 44          | 11             | 5                     | 5                  |
| Susantitaphong | "liver-type fatty acid-binding protein" or "L-FABP."                                                                                                                                                                                                                | "liver-type fatty acid-binding protein" OR L-FABP                                                                                                                                                                                                                 | Exact                                                             | 24-9-2012            |               | 4130    | 440         | 17             | 16                    | 14                 |

| <b>First author</b> | <b>Original search description</b>                                                                                                                                            | <b>Search strategy</b>                                                                                                             | <b>Changes</b>     | <b>Original search date</b> | <b>starting year</b> | <b>Hits GS</b> | <b>Hits PubMed</b> | <b>Included items</b> | <b>Includes in GS (1000)</b> | <b>Includes in PubMed</b> |
|---------------------|-------------------------------------------------------------------------------------------------------------------------------------------------------------------------------|------------------------------------------------------------------------------------------------------------------------------------|--------------------|-----------------------------|----------------------|----------------|--------------------|-----------------------|------------------------------|---------------------------|
| Verhoeven           | "diabetes" and one of the following words:<br>"telemedicine," "telecare,"<br>"telehealth," "e-health,"<br>"teleconsultation,"<br>"telemonitoring," or<br>"videoconferencing." | Diabetes AND (telemedicine OR telecare OR telehealth OR e-health OR teleconsultation OR telemonitoring OR videoconferencing)       | Rewritten slightly | 1-1-2009                    | 1994                 | 31100          | 410                | 89                    | 71                           | 67                        |
| Wei                 | "Confusion Assessment Method"                                                                                                                                                 | "Confusion Assessment Method"                                                                                                      | Exact              | 1-1-2007                    |                      | 5770           | 123                | 25                    | 21                           | 22                        |
| Wu                  | calcium, magnesium and oxaliplatin                                                                                                                                            | Calcium AND magnesium AND oxaliplatin                                                                                              | Added boolean      | 1-8-2011                    |                      | 5570           | 40                 | 7                     | 7                            | 7                         |
| Chen                | (i) 'pemphigus'; and (ii) 'human leukocyte antigen', 'HLA', 'major histocompatibility complex', 'MHC' or 'DRB1'.                                                              | Pemphigus AND ("human leukocyte antigen" OR HLA OR "major histocompatibility complex" OR MHC OR DRB1)                              | Rewritten slightly | 30-9-2011                   |                      | 7450           | 224                | 18                    | 18                           | 18                        |
| Zhu                 | '(food OR body OR attention OR emotion) AND ("anorexia nervosa" OR "eating disorder") AND ("functional magnetic resonance" OR fMRI)'                                          | (food OR body OR attention OR emotion) AND ("anorexia nervosa" OR "eating disorder") AND ("functional magnetic resonance" OR fMRI) | Exact              | 1-5-2012                    | 1980                 | 3780           | 94                 | 17                    | 17                           | 14                        |
